# Supplementary material for: Prognostic value of tumor-associated N1/N2 neutrophil plasticity in patients following radical resection of pancreas ductal adenocarcinoma
Source: HighWire-hosted journal article supplement (doi:10.1136/jitc-2022-005798), 2022-12-01
Supplement: jitc-2022-005798supp007_data_supplement.pdf [file jitc-2022-005798supp007_data_supplement.pdf]

**Supplementary Table 3. Univariate and multivariate analysis of prognostic factors associated with overall survival and recurrence-free survival in the validation cohort.**

| Variables                  | Overall survival          |                             |                          | Recurrence-free survival  |                             |                          |
|----------------------------|---------------------------|-----------------------------|--------------------------|---------------------------|-----------------------------|--------------------------|
|                            | Univariate <i>P</i> value | Multivariate <i>P</i> value | Multivariate HR (95% CI) | Univariate <i>P</i> value | Multivariate <i>P</i> value | Multivariate HR (95% CI) |
| <b>Gender</b>              |                           |                             |                          |                           |                             |                          |
| Male/Female                | 0.936                     | NA                          |                          | 0.380                     |                             |                          |
| <b>Age (years)</b>         |                           |                             |                          |                           |                             |                          |
| <65/≥65                    | 0.313                     | NA                          |                          | <b>0.021</b>              | <b>0.028</b>                | 5.087 (1.188-21.790)     |
| <b>Primary site</b>        |                           |                             |                          |                           |                             |                          |
| Head/Body or tail          | 0.566                     | NA                          |                          | 0.491                     |                             |                          |
| <b>Differentiation</b>     |                           |                             |                          |                           |                             |                          |
| I/II/III                   | 0.111                     | NA                          |                          | 0.109                     |                             |                          |
| <b>T stage</b>             |                           |                             |                          |                           |                             |                          |
| T1+T2/ T3+T4               | 0.183                     | NA                          |                          | 0.843                     |                             |                          |
| <b>N stage</b>             |                           |                             |                          |                           |                             |                          |
| N0/N1-2                    | 0.178                     | NA                          |                          | 0.163                     |                             |                          |
| <b>TNM stage</b>           |                           |                             |                          |                           |                             |                          |
| I/II/III                   | 0.342                     | NA                          |                          | 0.291                     |                             |                          |
| <b>Perineural invasion</b> |                           |                             |                          |                           |                             |                          |
| No/Yes                     | 0.232                     | NA                          |                          | <b>0.046</b>              | 0.270                       | 3.624 (0.368-35.679)     |
| <b>CA19-9</b>              |                           |                             |                          |                           |                             |                          |
| < 37/ ≥ 37 U/L             | 0.410                     | NA                          |                          | 0.748                     |                             |                          |
| <b>CEA</b>                 |                           |                             |                          |                           |                             |                          |
| < 5/ ≥ 5 ng/mL             | 0.701                     | NA                          |                          | 0.352                     |                             |                          |
| <b>TBIL</b>                |                           |                             |                          |                           |                             |                          |

|                                        |                  |              |                      |                  |              |                      |
|----------------------------------------|------------------|--------------|----------------------|------------------|--------------|----------------------|
| ≤ 20.4/ > 20.4 μmol/L                  | 0.394            | NA           |                      | 0.125            |              |                      |
| <b>Albumin</b>                         |                  |              |                      |                  |              |                      |
| < 35/ ≥ 35 g/L                         | 0.249            | NA           |                      | 0.666            |              |                      |
| <b>ALT</b>                             |                  |              |                      |                  |              |                      |
| ≤ 35/ > 35 U/L                         | 0.628            | NA           |                      | 0.613            |              |                      |
| <b>AST</b>                             |                  |              |                      |                  |              |                      |
| ≤ 40/ > 40 U/L                         | 0.798            | NA           |                      | 0.831            |              |                      |
| <b>GGT</b>                             |                  |              |                      |                  |              |                      |
| ≤ 60/ > 60 U/L                         | 0.577            | NA           |                      | 0.822            |              |                      |
| <b>Glucose</b>                         |                  |              |                      |                  |              |                      |
| ≤ 5.6/ > 5.6 mmol/L                    | 0.145            | NA           |                      | 0.315            |              |                      |
| <b>Tumor-associated N1 neutrophils</b> |                  |              |                      |                  |              |                      |
| Low/ High                              | <b>0.002</b>     | 0.152        | 0.280 (0.049-1.600)  | <b>0.017</b>     | 0.139        | 0.272 (0.049-1.526)  |
| <b>Tumor-associated N2 neutrophils</b> |                  |              |                      |                  |              |                      |
| Low/ High                              | <b>&lt;0.001</b> | <b>0.019</b> | 8.796 (1.430-54.116) | <b>&lt;0.001</b> | <b>0.036</b> | 7.939 (1.148-54.888) |
| <b>Tumor-infiltrating Tregs</b>        |                  |              |                      |                  |              |                      |
| Low/High                               | <b>0.083</b>     | 0.857        | 0.839 (0.125-5.657)  | <b>0.008</b>     | 0.161        | 2.689 (0.674-10.718) |
| <b>Tumor-infiltrating CD8+ T cells</b> |                  |              |                      |                  |              |                      |
| Low/High                               | 0.125            | NA           |                      | <b>0.011</b>     | 0.327        | 2.215 (0.452-10.868) |
