# Supplementary material for: Prognostic value of tumor-associated N1/N2 neutrophil plasticity in patients following radical resection of pancreas ductal adenocarcinoma
Source: HighWire-hosted journal article supplement (doi:10.1136/jitc-2022-005798), 2022-12-01
Supplement: jitc-2022-005798supp009_data_supplement.pdf [file jitc-2022-005798supp009_data_supplement.pdf]

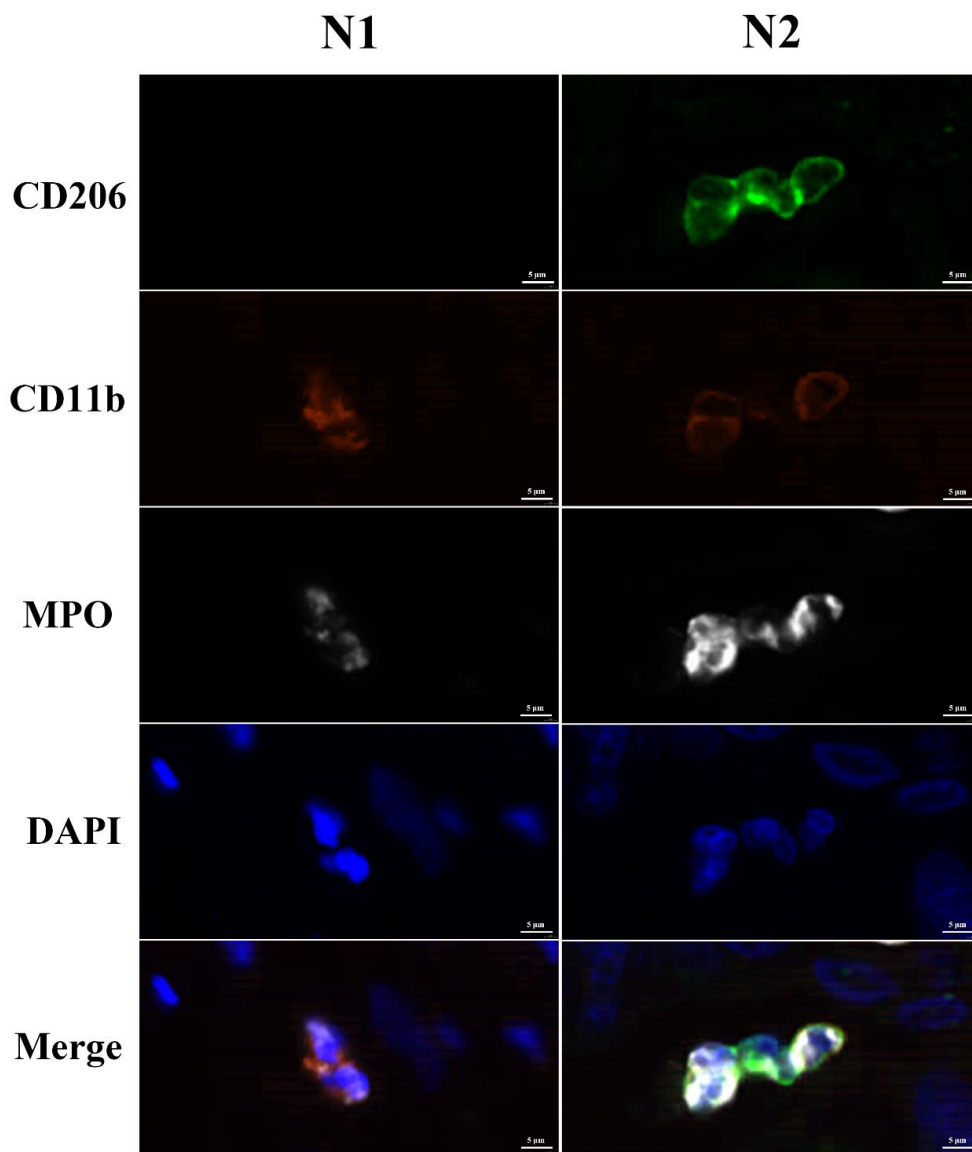

**Supplementary Figure 1.** Representative images of IF staining for tumor-associated N1 and N2 neutrophils. IF, immunofluorescence.

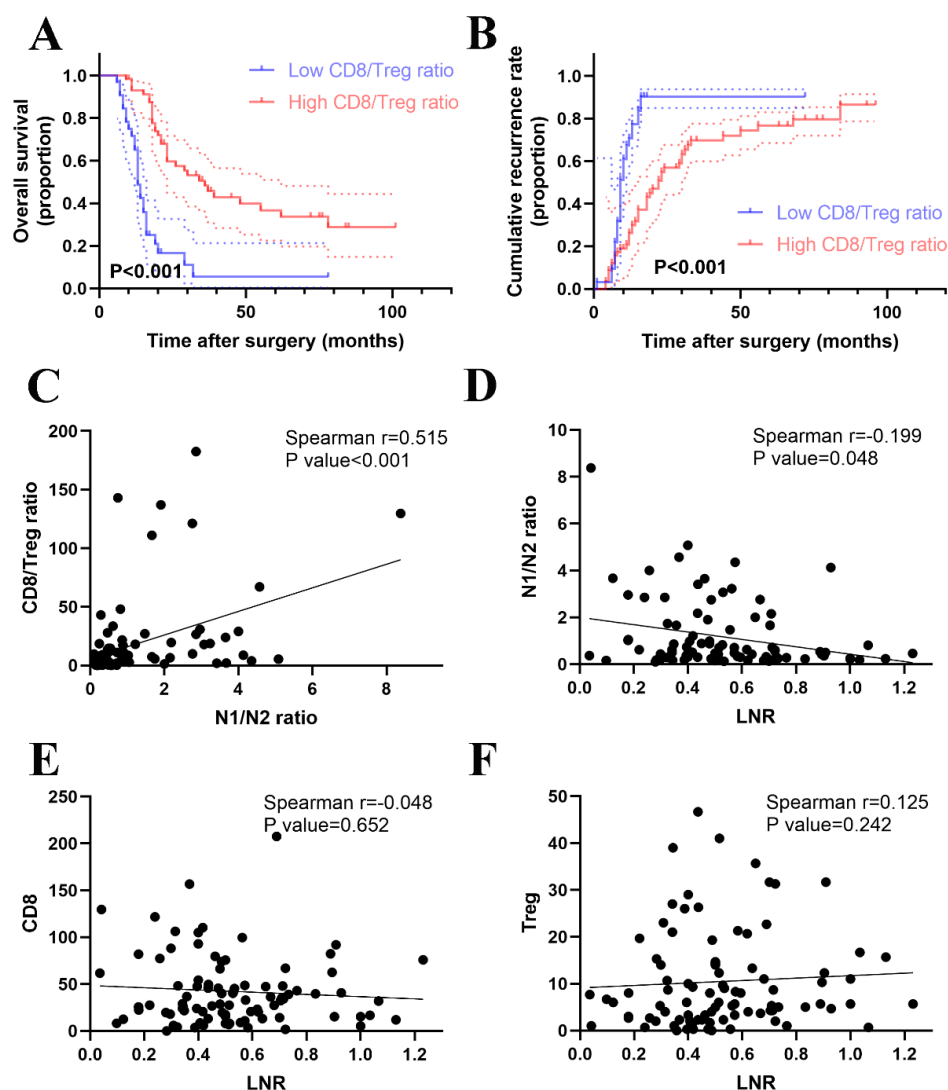

**Supplementary Figure 2.** Survival analysis by CD8/Treg ratio and correlation analysis in the primary cohort. (A-B) Kaplan-Meier plots for OS and RFS according to CD8/Treg ratio. (C) Correlation analysis between CD8/Treg ratio and N1/N2 ratio. (D) Correlation analysis between peripheral LNR and N1/N2 ratio. (E) Correlation analysis between peripheral LNR and tumor-infiltrating CD8<sup>+</sup> T cells. (F) Correlation analysis between peripheral LNR and tumor-infiltrating Tregs. OS, overall survival; RFS, recurrence-free survival; LNR, lymphocyte to neutrophil ratio.

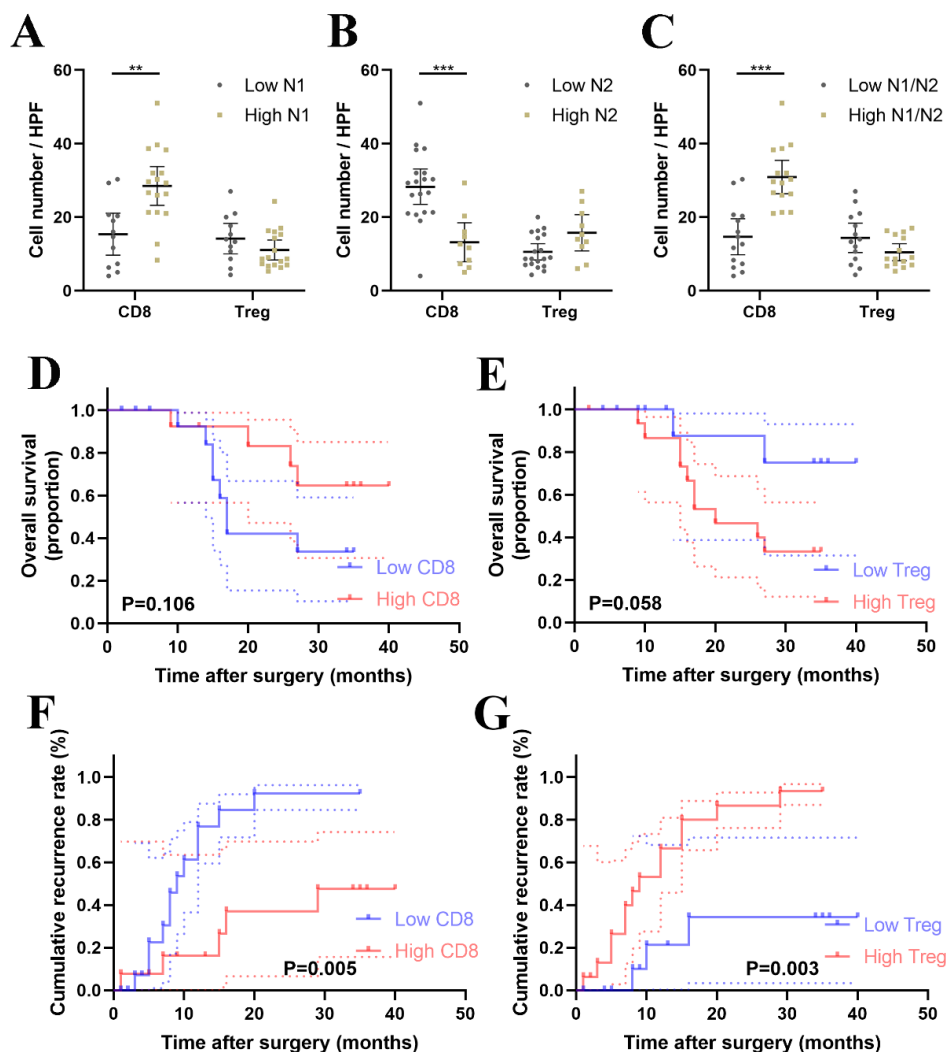

**Supplementary Figure 3.** Tumor-associated N1/N2 neutrophil plasticity along with immune infiltrations and survival in the validation cohort. (A-C) Comparison of tumor-infiltrating CD8<sup>+</sup> T cell and Treg numbers within different N1, N2 and N1/N2 ratio groups. (D-E) Kaplan–Meier plots for OS according to the different density of tumor-infiltrating CD8<sup>+</sup> T cells and Tregs. (F-G) Kaplan–Meier plots for RFS according to the different density of tumor-infiltrating CD8<sup>+</sup> T cells and Tregs. OS, overall survival; RFS, recurrence-free survival.

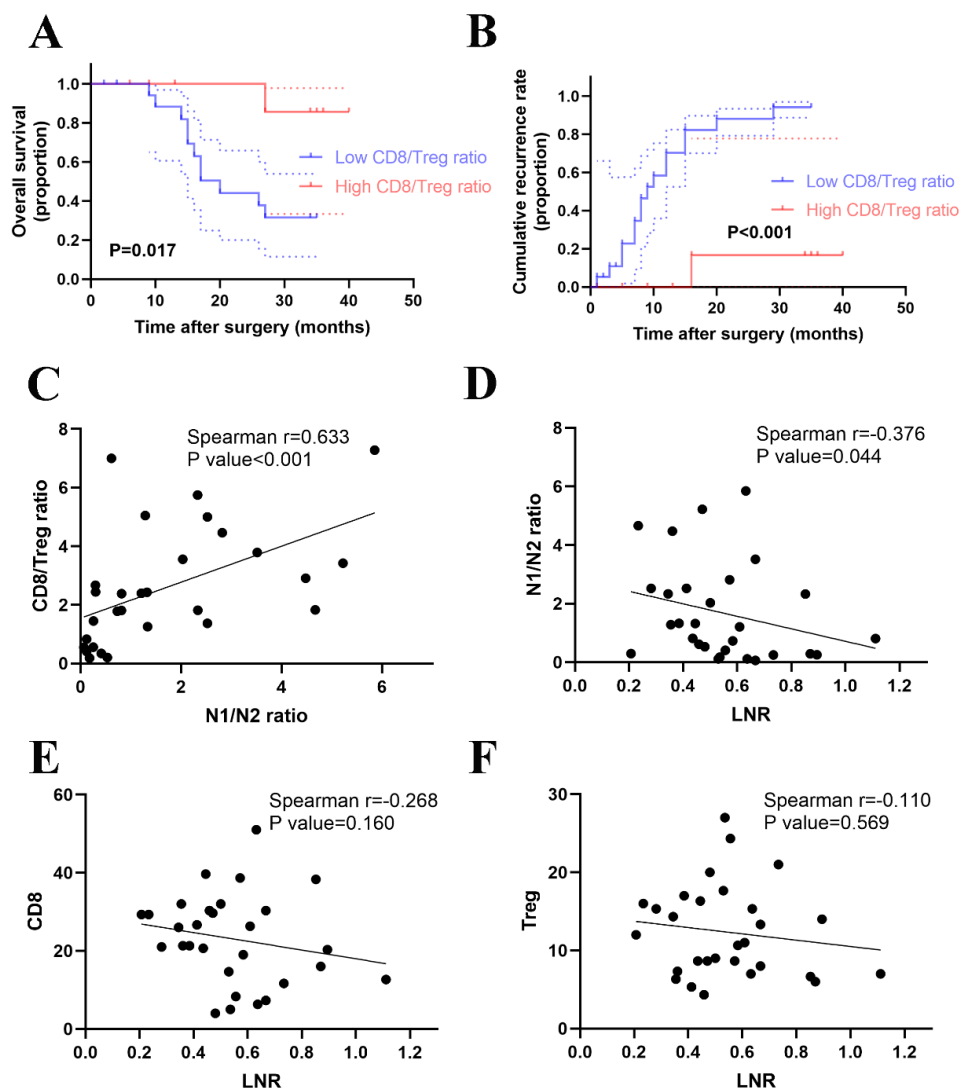

**Supplementary Figure 4.** Survival analysis by CD8/Treg ratio and correlation analysis in the validation cohort. (A-B) Kaplan-Meier plots for OS and RFS according to CD8/Treg ratio. (C) Correlation analysis between CD8/Treg ratio and N1/N2 ratio. (D) Correlation analysis between peripheral LNR and N1/N2 ratio. (E) Correlation analysis between peripheral LNR and tumor-infiltrating CD8<sup>+</sup> T cells. (F) Correlation analysis between peripheral LNR and tumor-infiltrating Tregs. OS, overall survival; RFS, recurrence-free survival; LNR, lymphocyte to neutrophil ratio.
