# Supplementary figures and images for: Prognostic value of tumor-associated N1/N2 neutrophil plasticity in patients following radical resection of pancreas ductal adenocarcinoma
Source: HighWire-hosted journal article supplement (doi:10.1136/jitc-2022-005798), 2022-12-01

**N1**

**N2**

**CD206**

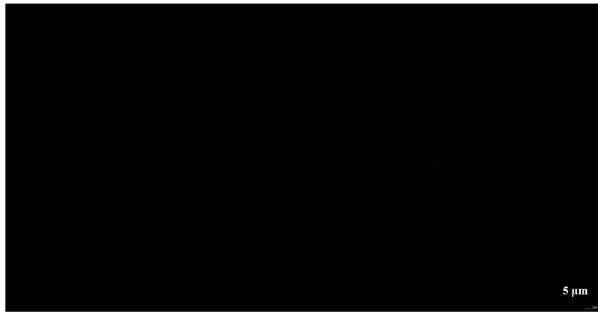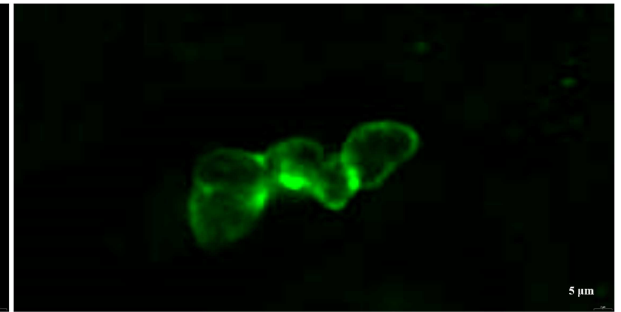

**CD11b**

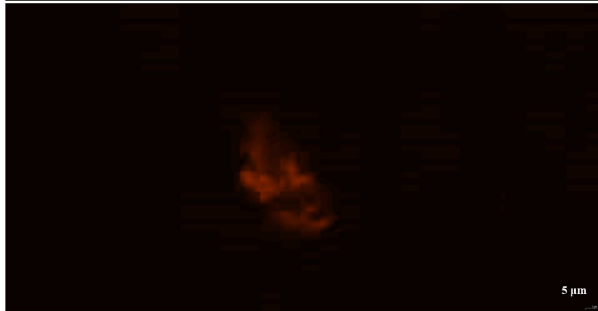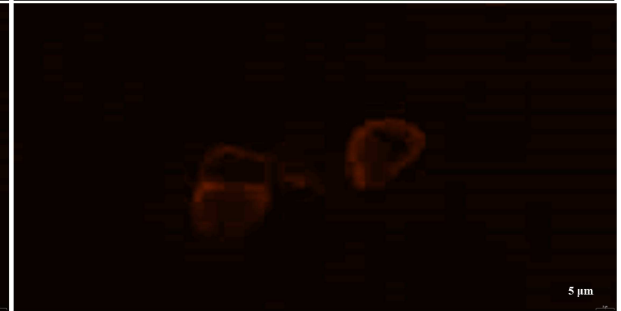

**MPO**

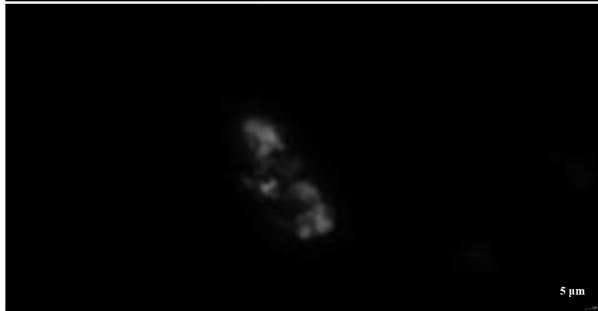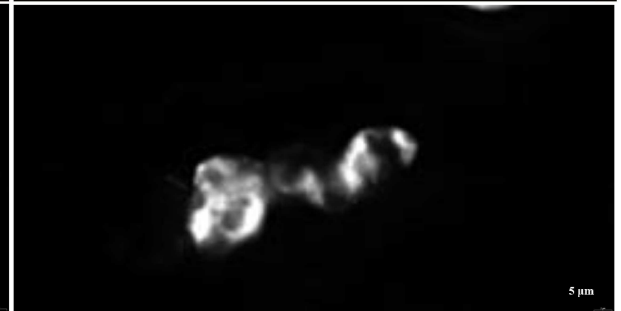

**DAPI**

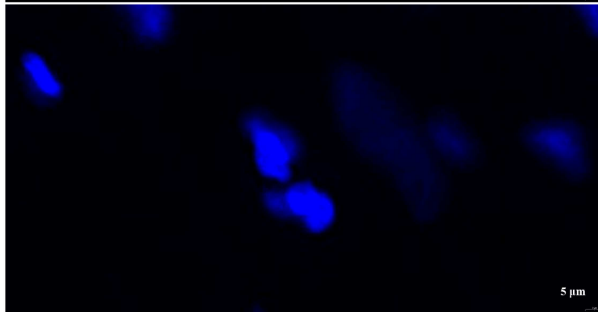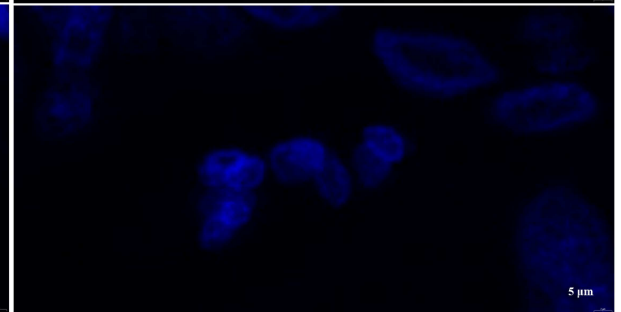

**Merge**

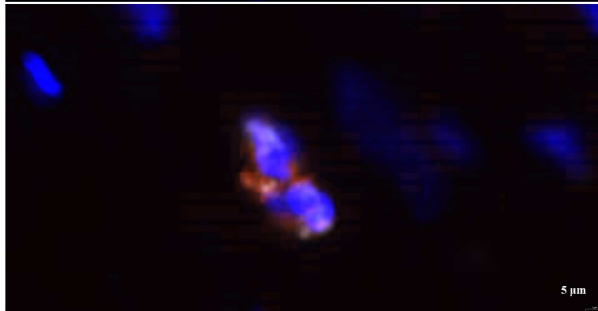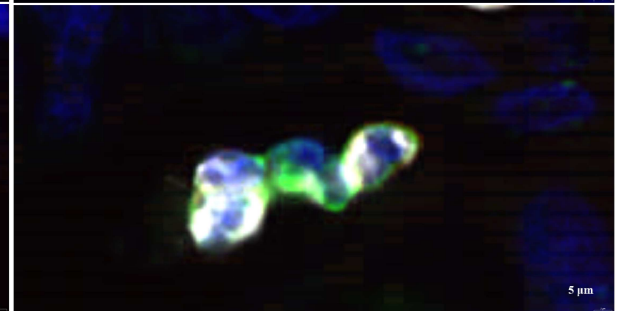

Supplement: jitc-2022-005798supp001_data_supplement.pdf [file jitc-2022-005798supp001_data_supplement.pdf]

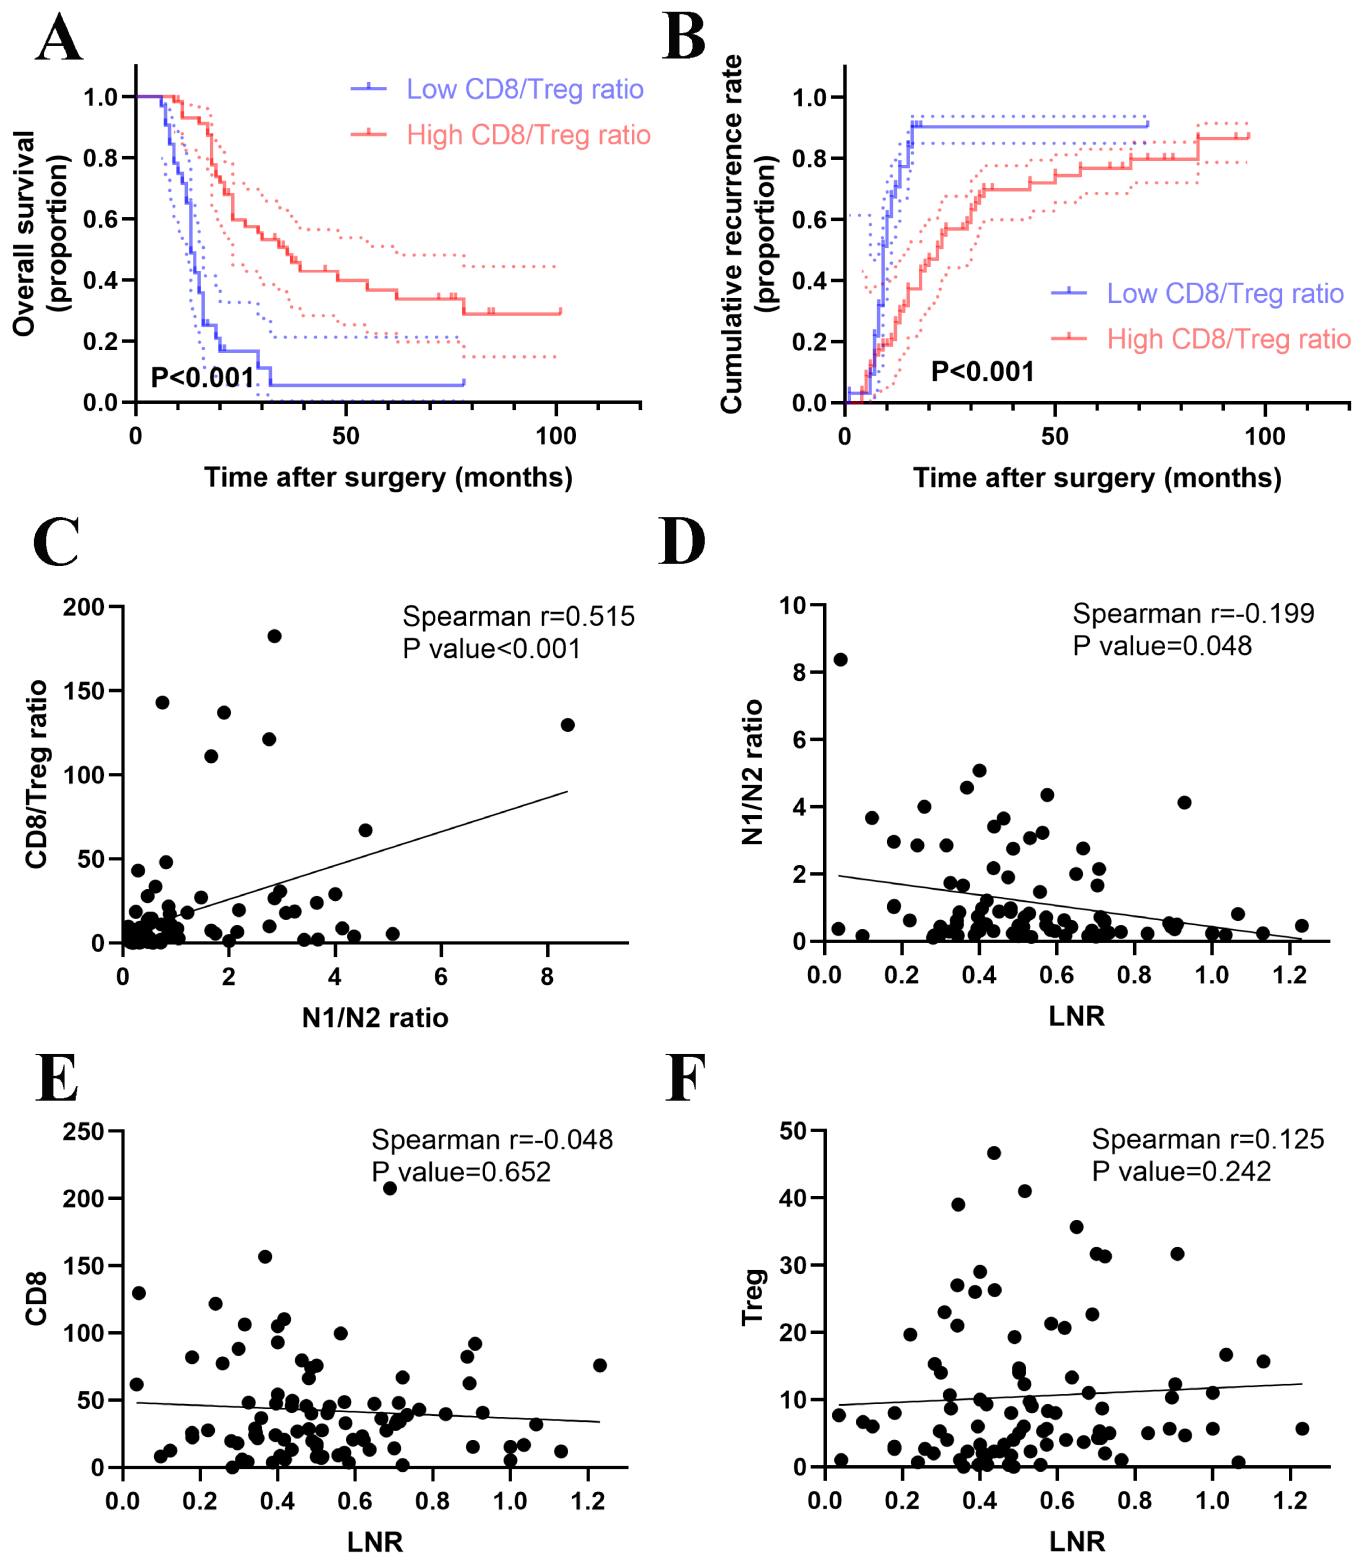

Supplement: jitc-2022-005798supp002_data_supplement.pdf [file jitc-2022-005798supp002_data_supplement.pdf]

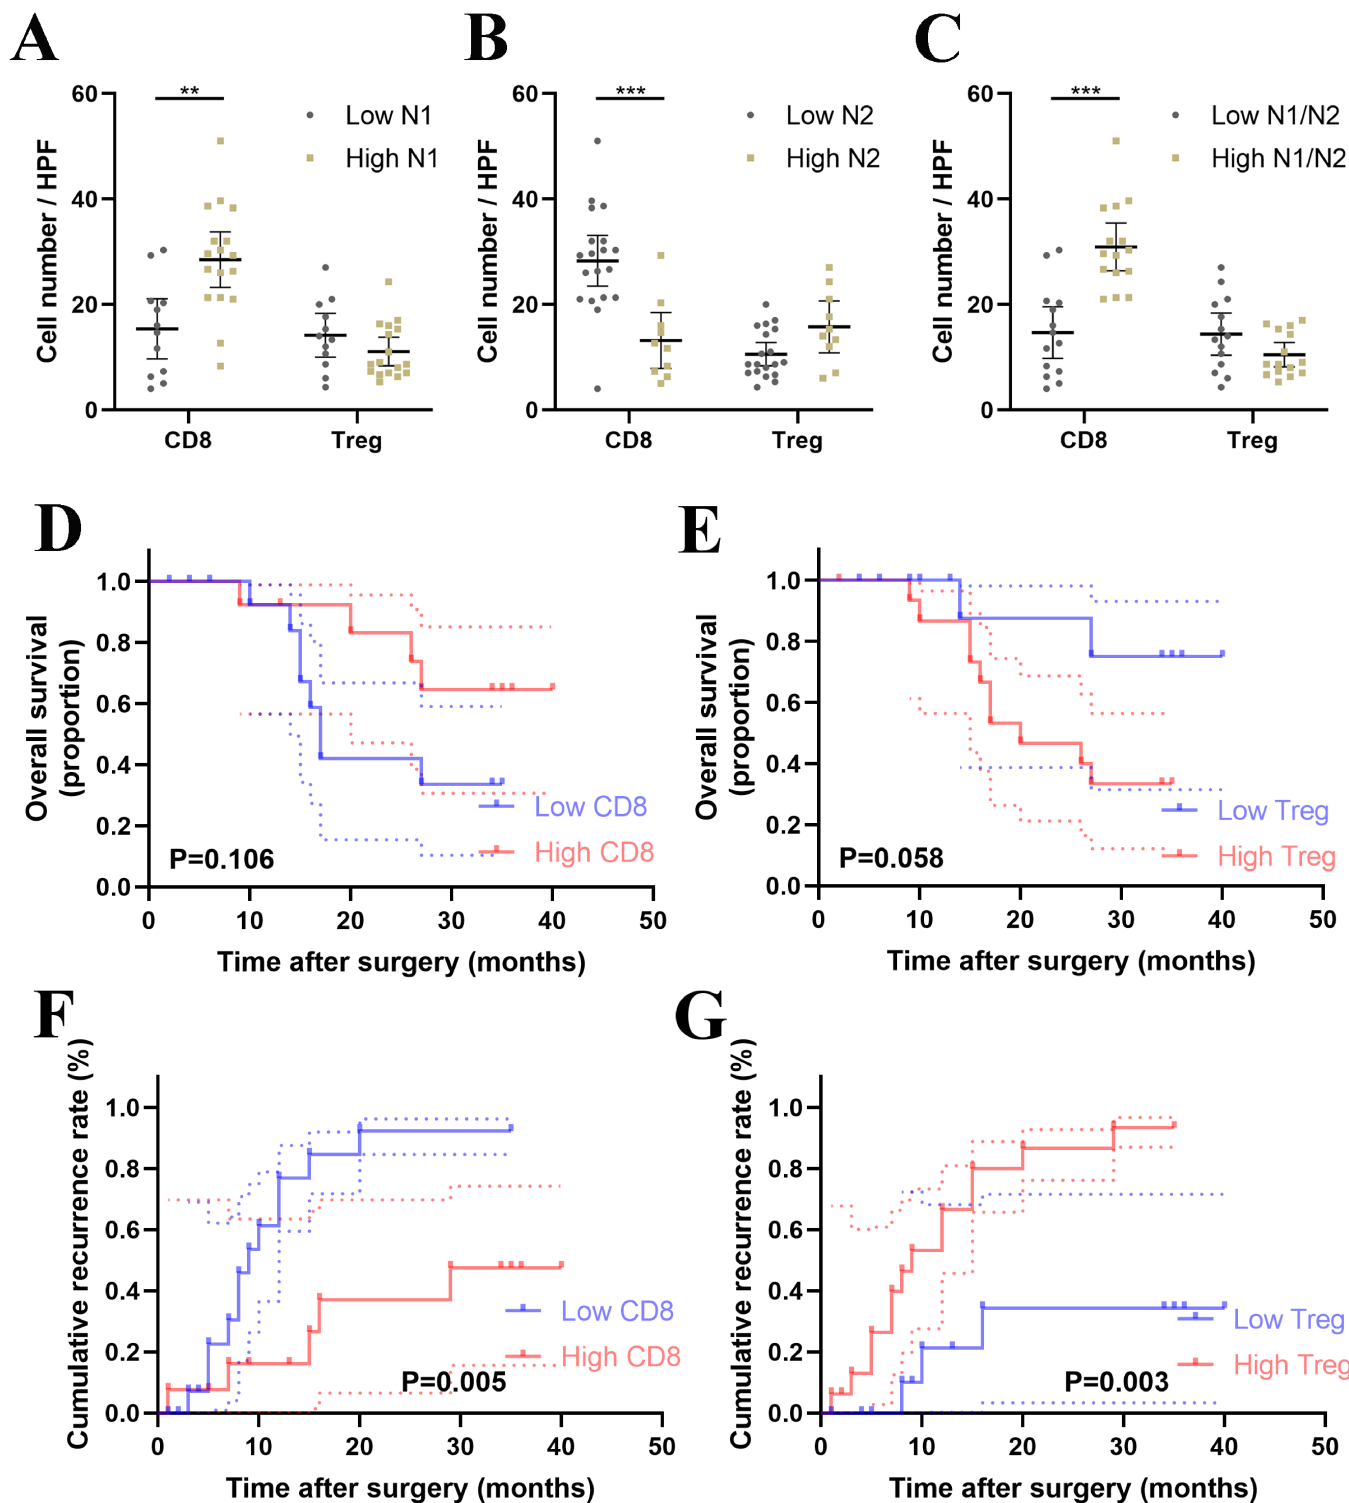

Supplement: jitc-2022-005798supp003_data_supplement.pdf [file jitc-2022-005798supp003_data_supplement.pdf]

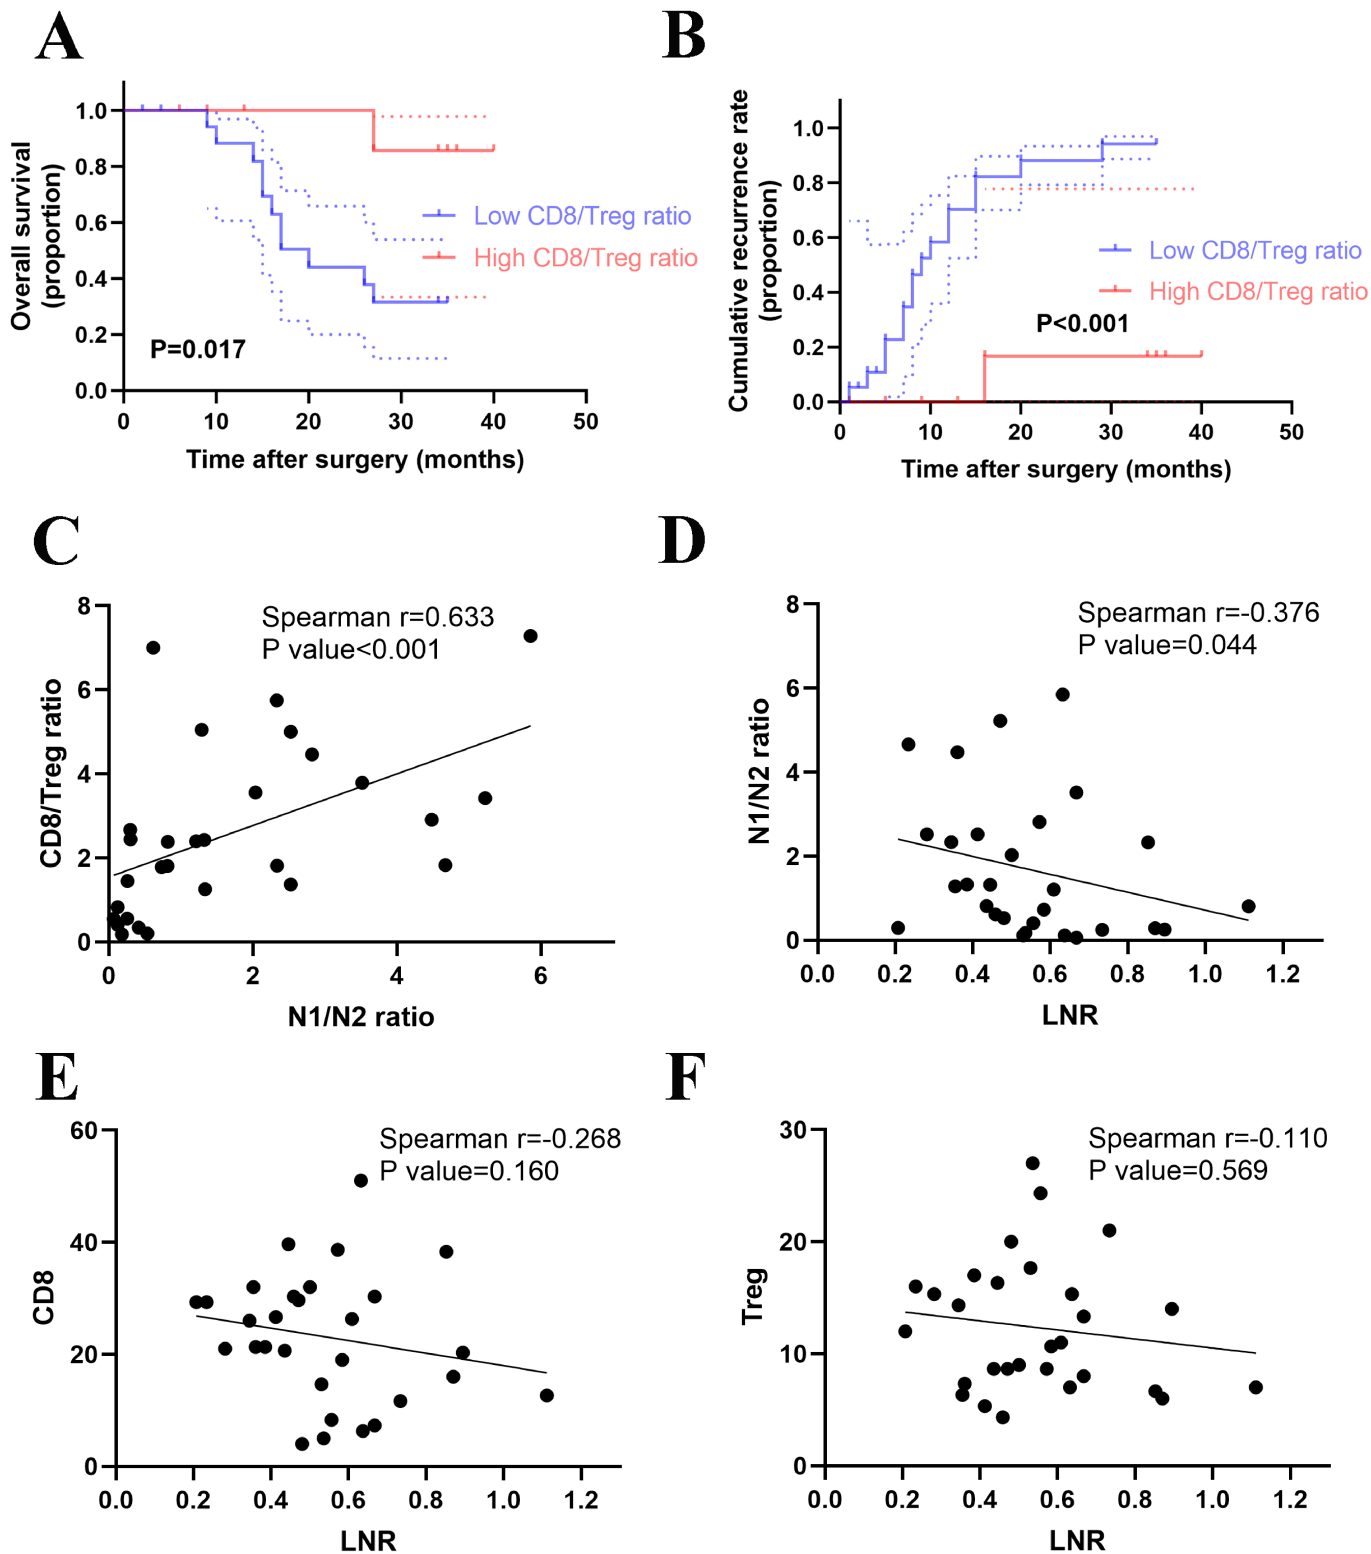

Supplement: jitc-2022-005798supp004_data_supplement.pdf [file jitc-2022-005798supp004_data_supplement.pdf]
